# Supplementary material
Source: Springer Nature journal article supplement (https://www.springermedizin.de/resource/supplementary/12879_2013_2978_MOESM1_ESM.pdf/9446108)

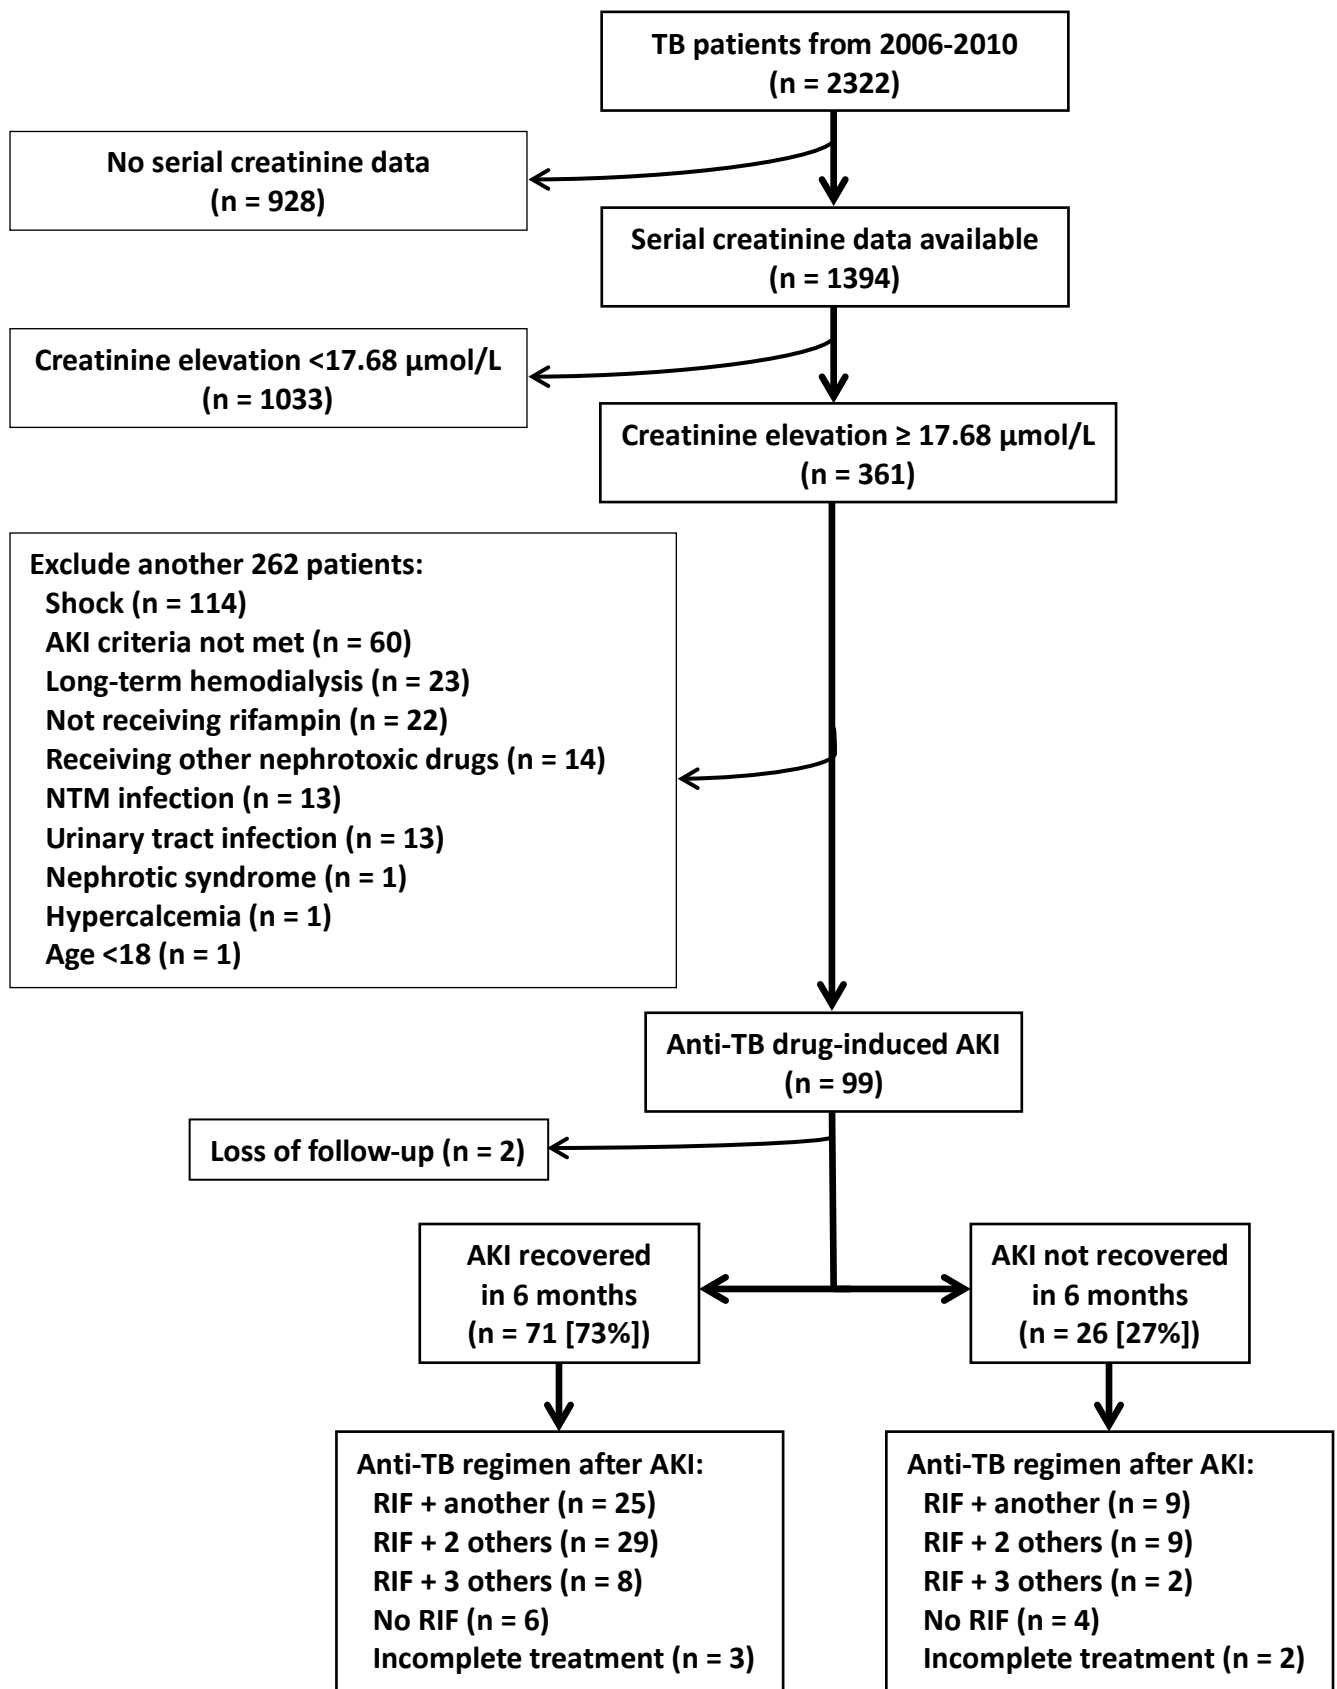

Supplement: MOESM1 [file 9446108]
